# Supplementary material for: Task-specific ionic liquid based in situ dispersive liquid–liquid microextraction for the sequential extraction and determination of chromium species: optimization by experimental design
Source: Royal Society of Chemistry journal article supplement (doi:10.1039/c5ra03475b), 2015-01-01
Supplement: c5ra03475b1.pdf [file c5ra03475b1.pdf]

**Task-specific ionic liquid based in situ dispersive liquid-liquid microextraction for the sequential extraction and determination of chromium species: Optimization by experimental design**

Susan Sadeghi<sup>\*\*</sup>, Ali Zeraatkar Moghaddam

*Department of Chemistry, Faculty of Science, University of Birjand, Birjand, South Khorasan, Iran*

---

\* Corresponding author. Fax: +98 56322 02008.  
E-mail address: [ssadeghi@birjand.ac.ir](mailto:ssadeghi@birjand.ac.ir) or [chemsad2001@yahoo.com](mailto:chemsad2001@yahoo.com)

**Table S1**

Design of matrix and responses for BBD.

| Run | Sample pH | Amount of functionalized IL (% w/v) | Amount of KPF <sub>6</sub> (% w/v) | EE (%) of Cr(III) | EE (%) of Cr(VI) |
|-----|-----------|-------------------------------------|------------------------------------|-------------------|------------------|
| 1   | 0         | -1                                  | +1                                 | 68.4              | 57.5             |
| 2   | 0         | 0                                   | 0                                  | 97.1              | 101.0            |
| 3   | 0         | 0                                   | 0                                  | 97.8              | 98               |
| 4   | -1        | 0                                   | +1                                 | 77.5              | 90.3             |
| 5   | 0         | 0                                   | 0                                  | 97.0              | 100.1            |
| 6   | -1        | 0                                   | -1                                 | 62.5              | 74.7             |
| 7   | +1        | -1                                  | 0                                  | 74.7              | 53.3             |
| 8   | +1        | +1                                  | 0                                  | 100.4             | 88.6             |
| 9   | 0         | 0                                   | 0                                  | 94.0              | 98.8             |
| 10  | -1        | +1                                  | 0                                  | 84.0              | 98.1             |
| 11  | 0         | +1                                  | -1                                 | 88.1              | 81.9             |
| 12  | -1        | -1                                  | 0                                  | 58.0              | 60.8             |
| 13  | +1        | 0                                   | -1                                 | 80.3              | 66.9             |
| 14  | 0         | -1                                  | -1                                 | 50.5              | 46.6             |
| 15  | 0         | +1                                  | +1                                 | 97.5              | 102.1            |
| 16  | 0         | 0                                   | 0                                  | 95.8              | 97.6             |
| 17  | +1        | 0                                   | +1                                 | 92.6              | 84.3             |

**Fig S1.**  $^{13}\text{C}$ NMR of (a) [8-HQ- $\text{C}_2\text{C}_1\text{Im}$ ][Br] and (b) PDC- $\text{C}_2\text{C}_1\text{Im}$ ][Br].

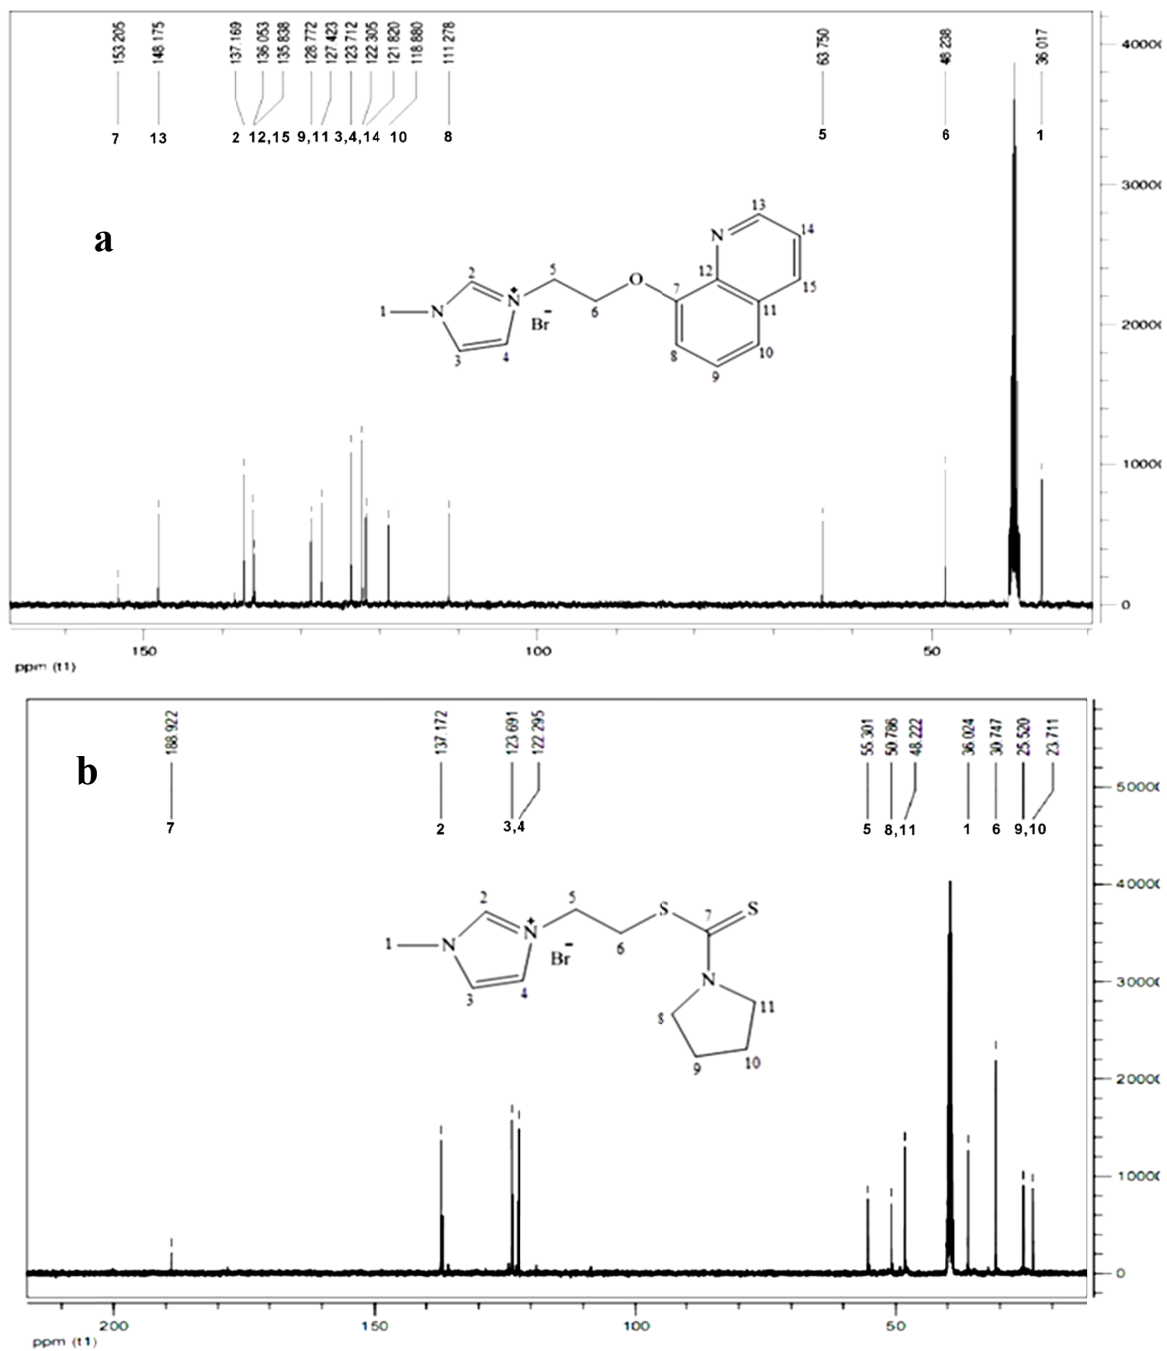

**Fig. S2.** FTIR spectra of (a) [8-HQ-C<sub>2</sub>C<sub>1</sub>Im][Br] and (b) PDC-C<sub>2</sub>C<sub>1</sub>Im][Br] in KBr plates.

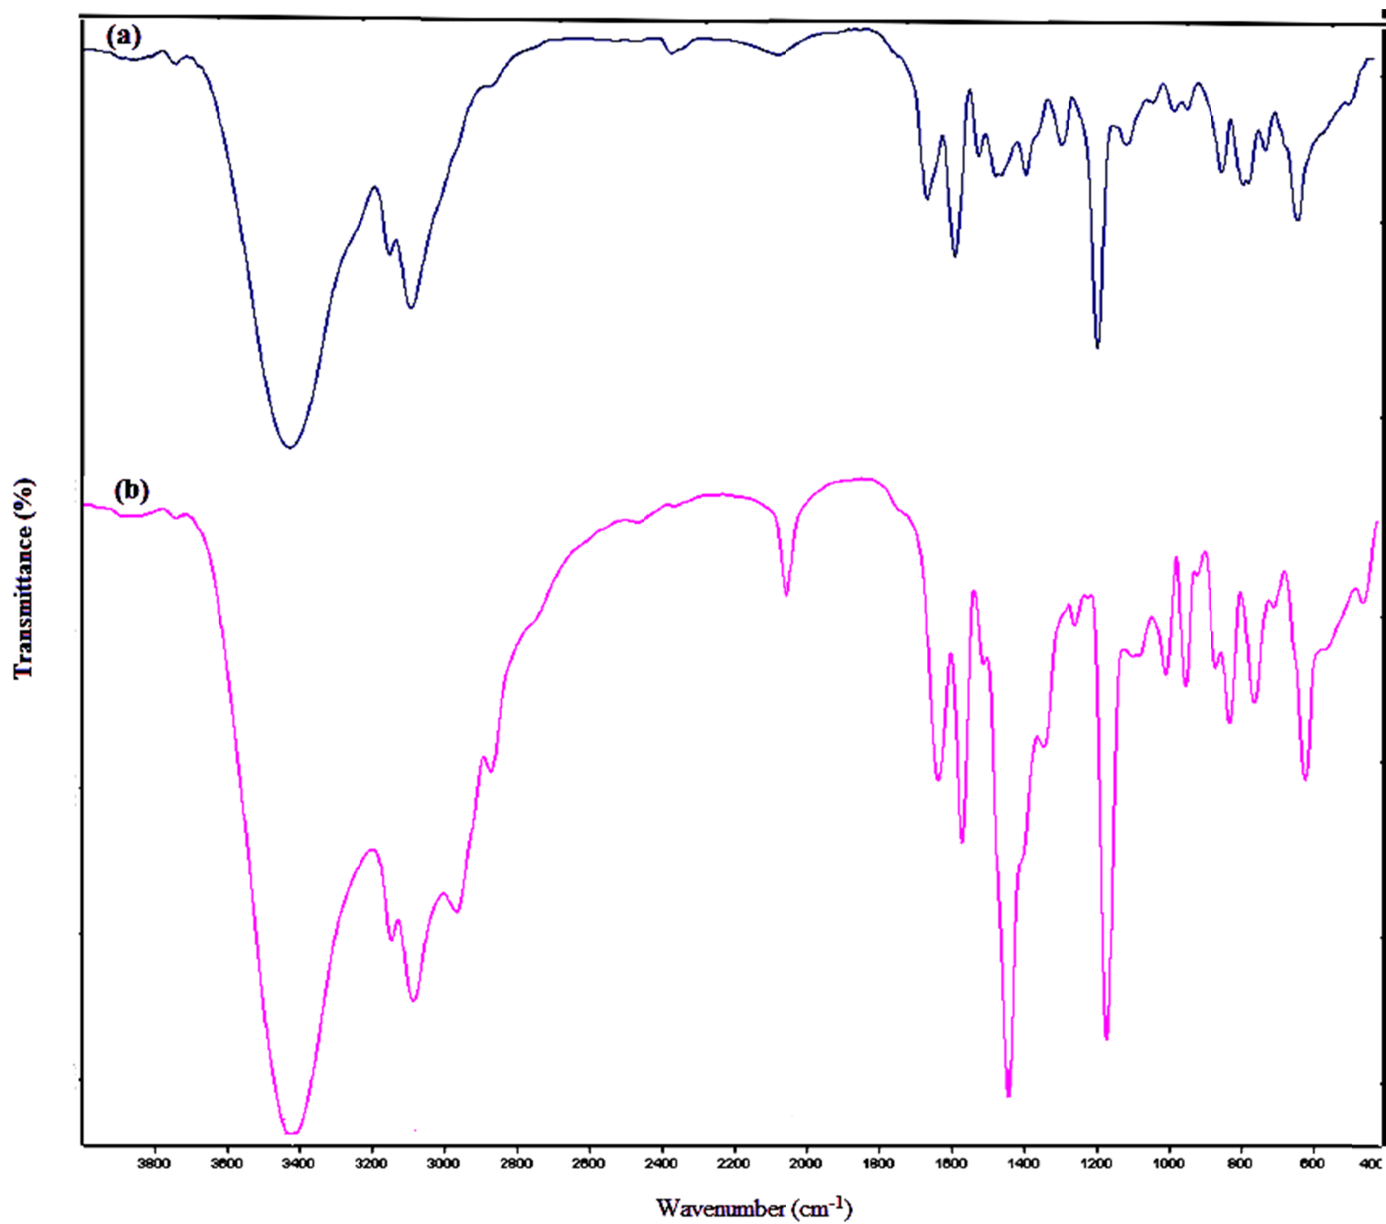

**Fig. S3.** Normal probability plots of studentized residuals for the refined quadratic models of extraction efficiency of Cr(III) (a) and extraction efficiency Cr(VI) (b).

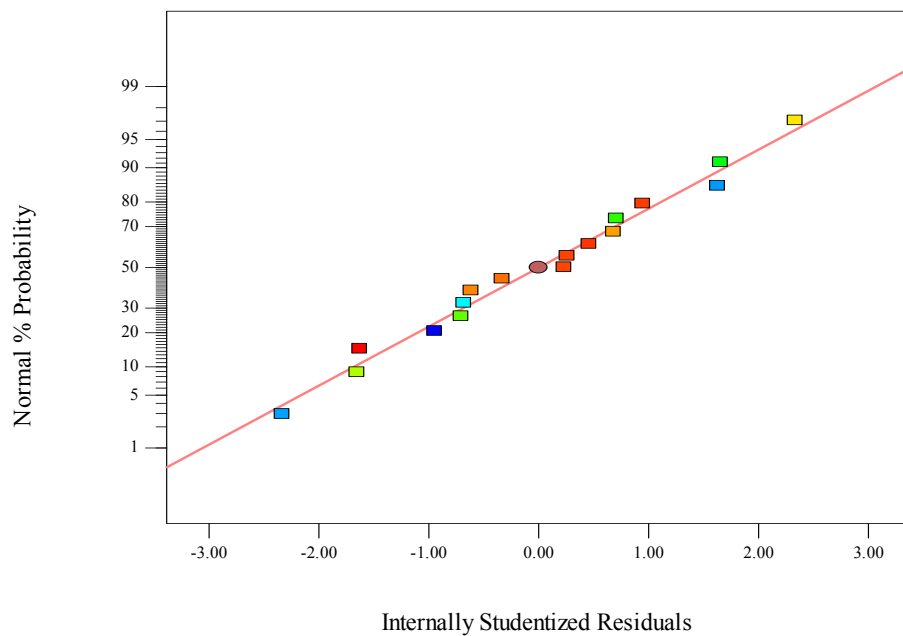

**(a)**

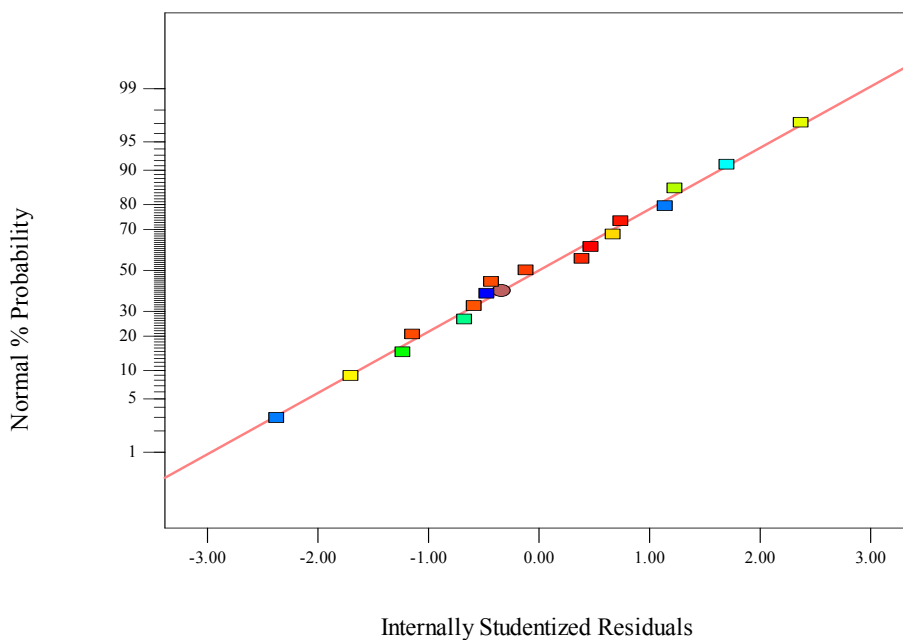

**(b)**
